# Supplementary material
Source: MDPI journal article supplement (https://www.mdpi.com/2073-4395/12/2/272)
Supplement: s1 [file s1]

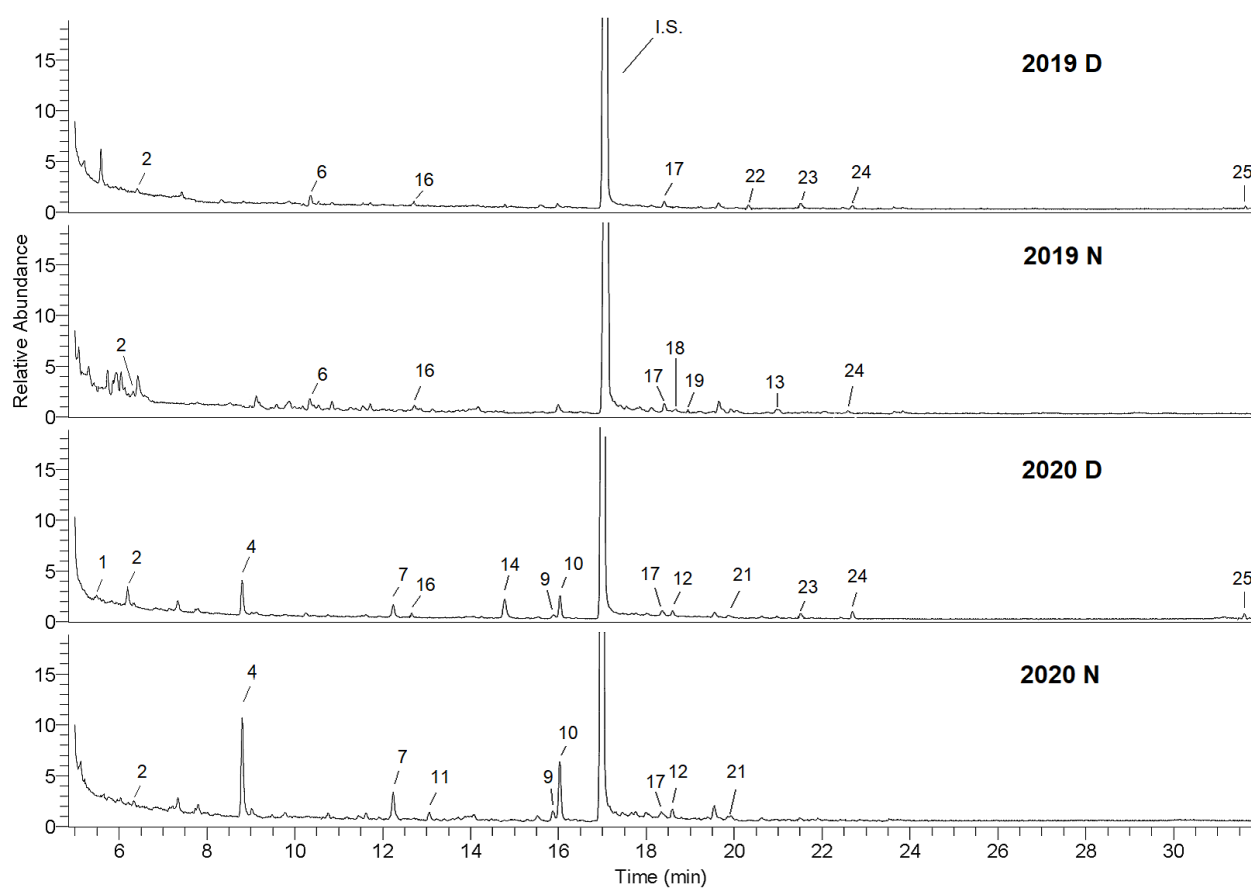

**Figure S1.** Representative Total Ions Chromatograms of VOCs emitted by foliage of grapevine cv Isabella following diurnal (2019 D and 2020 D) and nocturnal (2019 N and 2020 N) sampling in 2019 and 2020. At 17.00 min the peak of 2-octanol (Internal Standard).
